# Supplementary material for: Assessing the economic potential of large-scale carbonate-formation-free CO2 electrolysis
Source: Royal Society of Chemistry journal article supplement (doi:10.1039/d2cy00045h), 2022-01-01
Supplement: d2cy00045h1.pdf [file d2cy00045h1.pdf]

## Supplementary Information for

### **Assessing the economic potential of large-scale, carbonate-formation-free CO<sub>2</sub> electrolysis**

Xuechen Jing<sup>1,2</sup>, Fengwang Li<sup>2,\*</sup>, Yuhang Wang<sup>1,\*</sup>

*<sup>1</sup>Institute of Functional Nano & Soft Materials (FUNSOM), Jiangsu Key Laboratory for Carbon-Based Functional Materials and Devices, Soochow University, 199 Ren'ai Road, Suzhou, Jiangsu, 215123, China.*

*<sup>2</sup>School of Chemical and Biomolecular Engineering, The University of Sydney, NSW 2006, Australia.*

\*Correspondence to: Yuhang Wang (yhwang1988@suda.edu.cn) (Y.W.) and Fengwang Li

(fengwang.li@sydney.edu.au).

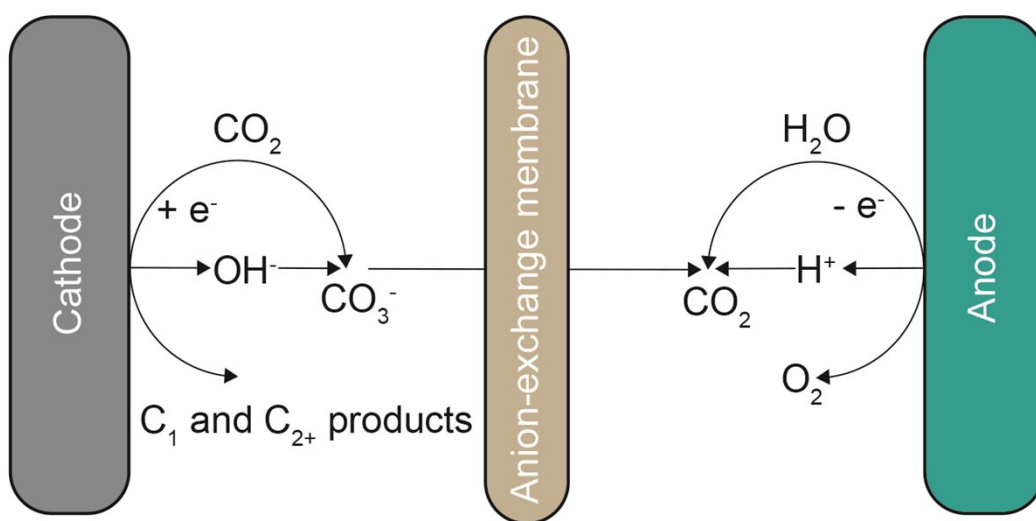

**Figure S1. Carbonate formation.** A schematic illustration of carbonate formation and crossover during CO<sub>2</sub> electroreduction in an MEA using an anion-exchange membrane.

**Note S1. The modeling methods.**

We develop the TEA model according to the previous reports,<sup>1,2</sup> and list the related parameters (Table S5) contributing to the ethanol production cost. Furthermore, we compare the results of two situations with and without carbonate formation during CO<sub>2</sub> electroreduction.

The modeling inputs are tabulated below (taking ethanol production as an example):

**Table S1.** The input parameters of sample calculations.

| <b>Parameters</b>                | <b>Value</b>              |
|----------------------------------|---------------------------|
| Production rate                  | 100 tonne/day             |
| Ethanol molecular weight         | 46.07 g/mole              |
| Ethanol density                  | 0.789 kg/L                |
| CO <sub>2</sub> molecular weight | 44 g/mole                 |
| CO <sub>2</sub> ratio            | 2                         |
| Electrons transferred            | 12                        |
| Reference current density        | 400 mA/cm <sup>2</sup>    |
| Balance of plant                 | 50%                       |
| Lang factor                      | 1                         |
| Capacity factor                  | 0.9                       |
| Discount rate                    | 0.07                      |
| CO <sub>2</sub> crossover ratio  | 3                         |
| The volume ratio of electrolyte  | 100                       |
| PSA reference cost               | 1989043 USD               |
| PSA reference scale              | 1000 m <sup>3</sup> /hour |
| PSA scaling factor               | 0.7                       |

|                                       |                          |
|---------------------------------------|--------------------------|
| PSA energy consumed                   | 0.25 kWh/ m <sup>3</sup> |
| Distillation reference cost           | 4162240 USD              |
| Distillation reference scale          | 1000 L/min               |
| Distillation scaling factor           | 0.7                      |
| Distillation reference operating cost | 9895.17 USD/day          |
| Electrolyte lifetime                  | 1 year                   |
| H <sub>2</sub> O product ratio        | 9                        |
| H <sub>2</sub> O price                | 1 USD/tonne              |
| CO <sub>2</sub> price                 | 40 USD/tonne             |
| Electricity price                     | 0.05 USD/kWh             |
| Electrolyzer price                    | 550 USD/kW               |
| Cell voltage                          | 3.5 V                    |
| Faradaic efficiency                   | 30 %                     |
| Single-pass utilization               | 25 %                     |
| Input current density                 | 100 mA/cm <sup>2</sup>   |
| System lifetime                       | 10 year                  |
| MEA lifetime                          | 1 year                   |

### CO<sub>2</sub> and H<sub>2</sub>O cost calculation

The CO<sub>2</sub> cost can be calculated using Equation 1:

$$\begin{aligned}
 &CO_2 \text{ required } \left( \frac{\text{tonne}}{\text{day}} \right) && (1) \\
 &= \text{product output } \left( \frac{\text{tonne}}{\text{day}} \right) \times \frac{CO_2 \text{ molecular weight } (g)}{\text{Product molecular weight}}
 \end{aligned}$$

Plugging in the model ethanol output rate, CO<sub>2</sub> molecular weight, ethanol molecular weight, CO<sub>2</sub> ratio, and CO<sub>2</sub> single-pass utilization:

$$CO_2 \text{ required } \left( \frac{\text{tonne}}{\text{day}} \right) = 100 \left( \frac{\text{tonne}}{\text{day}} \right) \times \frac{44 \left( \frac{\text{g}}{\text{mol}} \right)}{46.07 \left( \frac{\text{g}}{\text{mol}} \right)} \times \frac{2 \left( \frac{CO_2}{\text{product}} \right)}{25\%} = 764.05 \left( \frac{\text{tonne}}{\text{day}} \right) \quad (1b)$$

**The CO<sub>2</sub> purchased cost is:**

$$CO_2 \text{ cost } (\$ \text{ per tonne product}) = CO_2 \text{ required } \left( \frac{\text{tonne}}{\text{day}} \right) \times \frac{CO_2 \text{ price } \left( \frac{\$}{\text{tonne}} \right)}{\text{Production rate } \left( \frac{\text{tonne product}}{\text{day}} \right)} \quad (2)$$

$$\begin{aligned} CO_2 \text{ cost } (\$ \text{ per tonne product}) \\ = 764.05 \left( \frac{\text{tonne}}{\text{day}} \right) \times \frac{40 \left( \frac{\$}{\text{tonne}} \right)}{100 \left( \frac{\text{tonne product}}{\text{day}} \right)} = 305.62 (\$ \text{ per tonne product}) \end{aligned} \quad (2b)$$

**The water cost calculation is:**

$$\begin{aligned} H_2O \text{ required } \left( \frac{\text{tonne}}{\text{day}} \right) \\ = \text{product output } \left( \frac{\text{tonne}}{\text{day}} \right) \times \frac{H_2O \text{ molecular weight } \left( \frac{\text{g}}{\text{mol}} \right)}{\text{Product molecular weight } \left( \frac{\text{g}}{\text{mol}} \right)} \times \text{molar ratio } \left( \frac{H_2O}{\text{product}} \right) \end{aligned} \quad (3)$$

$$H_2O \text{ required } \left( \frac{\text{tonne}}{\text{day}} \right) = 100 \left( \frac{\text{tonne}}{\text{day}} \right) \times \frac{18 \left( \frac{\text{g}}{\text{mol}} \right)}{46.07 \left( \frac{\text{g}}{\text{mol}} \right)} \times 9 = 351.64 \left( \frac{\text{tonne}}{\text{day}} \right) \quad (3b)$$

$$H_2O \text{ cost } (\$ \text{ per tonne product}) = H_2O \text{ required } \left( \frac{\text{tonne}}{\text{day}} \right) \times \frac{H_2O \text{ price } \left( \frac{\$}{\text{tonne}} \right)}{\text{Production rate } \left( \frac{\text{tonne product}}{\text{day}} \right)} \quad (4)$$

$$H_2O \text{ cost } (\$ \text{ per tonne product}) = 351.64 \left( \frac{\text{tonne}}{\text{day}} \right) \times \frac{1 \left( \frac{\$}{\text{tonne}} \right)}{100 \left( \frac{\text{tonne product}}{\text{day}} \right)} = 3.52 (\$ \text{ per tonne pr}) \quad (4b)$$

### Electrolyzer capital cost

Firstly, we need to transfer the unit of production rate from tonne/day to mole/s to calculate the electrolyzer capital cost.

$$\text{Production rate } \left( \frac{\text{mol}}{\text{s}} \right) = \frac{\text{Production rate } \left( \frac{\text{g}}{\text{day}} \right)}{\text{product molecular weight } \left( \frac{\text{g}}{\text{mol}} \right) \times 86400 \left( \frac{\text{s}}{\text{day}} \right)} \quad (5)$$

$$\text{Production rate } \left( \frac{\text{mol}}{\text{s}} \right) = \frac{1 \times 10^8 \left( \frac{\text{g}}{\text{day}} \right)}{46.07 \left( \frac{\text{g}}{\text{mol}} \right) \times 86400 \left( \frac{\text{s}}{\text{day}} \right)} = 25.12 \left( \frac{\text{mol}}{\text{s}} \right) \quad (5b)$$

Based on the ethanol production rate, we can obtain total current density by use following equation:

$$Total\ current\ (A) = \frac{Production\ rate\ \left(\frac{mol}{s}\right) \times electrons\ transferred \times 96485\ \left(\frac{sA}{mol}\right)}{FE/100} \quad (6)$$

$$Total\ current\ (A) = \frac{25.12\ \left(\frac{mol}{s}\right) \times 12 \times 96485\ \left(\frac{sA}{mol}\right)}{30/100} = 96958935.28(A) \quad (6b)$$

The discount rate and system lifetime are already known, so the capital recovery factor (CRF) of electrolyzer can be got:

$$CRF_{electrolyzer} = \frac{Discount\ rate \times (1 + discount\ rate)^{System\ lifetime}}{(1 + discount\ rate)^{System\ lifetime} - 1} \quad (7)$$

$$CRF_{electrolyzer} = \frac{0.07 \times (1 + 0.07)^{10}}{(1 + 0.07)^{10} - 1} = 0.1424 \quad (7b)$$

Total electrolyzer capital cost is:

$$\begin{aligned} & Total\ electrolyzer\ capital\ cost\ (\$) \\ & = Power\ consumption\ (kW) \times Electrolyzer\ price\ \left(\frac{\$}{kW}\right) \times \frac{Base\ current\ density\ \left(\frac{n}{c}\right)}{Input\ current\ density\ \left(\frac{r}{c}\right)} \end{aligned} \quad (8)$$

$$\begin{aligned} & Total\ electrolyzer\ capital\ cost\ (\$) \\ & = 96958935.28\ (A) \times 3.5\ (V) \div 1000\ (s) \times 550\ \left(\frac{\$}{kW}\right) \times \frac{400\ \left(\frac{mA}{cm^2}\right)}{100\ \left(\frac{mA}{cm^2}\right)} = 746583801.6 \end{aligned} \quad (8b)$$

Therefore, electrolyzer capital cost per tonne product is:

$$\text{Electrolyzer capital cost} \left( \frac{\$}{\text{tonne product}} \right) = \frac{CRF_{\text{electrolyzer}} \times \text{Total electrolyzer cost} (\$)}{\text{Capacity factor} \times 365 \left( \frac{\text{days}}{\text{year}} \right) \times \text{production rate} \left( \frac{\text{tonne}}{\text{day}} \right)} \quad (9)$$

$$\text{Electrolyzer capital cost} \left( \frac{\$}{\text{tonne product}} \right) = \frac{0.1424 \times 746583801.6(\$)}{0.9 \times 365 \left( \frac{\text{days}}{\text{year}} \right) \times 100 \left( \frac{\text{tonne}}{\text{day}} \right)} = 3235.82 \left( \frac{\$}{\text{tonne product}} \right) \quad (9b)$$

### Catalyst and membrane (CM) cost:

We assume that the CM cost is equal to 5% of the total electrolyzer capital cost. Thus, it can be obtained using the following calculations.

$$CRF_{CM} = \frac{\text{Discount rate} \times (1 + \text{discount rate})^{CM \text{ lifetime}}}{(1 + \text{discount rate})^{CM \text{ lifetime}} - 1} \quad (10)$$

$$CRF_{CM} = \frac{0.07 \times (1 + 0.07)^1}{(1 + 0.07)^1 - 1} = 1.07 \quad (10b)$$

$$CM \text{ cost} \left( \frac{\$}{\text{tonne product}} \right) = \frac{CRF_{CM} \times \text{Total electrolyzer capital cost} (\$) \times 0.05}{\text{Capacity factor} \times 365 \left( \frac{\text{days}}{\text{year}} \right) \times \text{production rate} \left( \frac{\text{tonne}}{\text{day}} \right)} \quad (11)$$

$$CM \text{ cost} \left( \frac{\$}{\text{tonne product}} \right) = \frac{1.07 \times 746583801.6(\$) \times 0.05}{0.9 \times 365 \left( \frac{\text{days}}{\text{year}} \right) \times 100 \left( \frac{\text{tonne}}{\text{day}} \right)} \quad (11b)$$

### Electrolyzer operating and other operating cost

The operating cost of electrolyzer is based on the power consumption and electricity price:



$$\begin{aligned} \text{Electrolyzer operating cost} \left( \frac{\$}{\text{tonne product}} \right) & \quad (12) \\ & = \frac{\text{Power consumption} \times 24 \left( \frac{\text{hr}}{\text{day}} \right) \times \text{electricity price} \left( \frac{\$}{\text{kWh}} \right)}{\text{Production rate} \left( \frac{\text{tonne}}{\text{day}} \right)} \end{aligned}$$

$$\begin{aligned} \text{Electrolyzer operating cost} \left( \frac{\$}{\text{tonne product}} \right) & \quad (12b) \\ & = \frac{96958935.28 \text{ (A)} \times 3.5 \text{ (V)} \div 1000 \text{ (s)} \times 24 \left( \frac{\text{hr}}{\text{day}} \right) \times e = 0.05 \left( \frac{\$}{\text{kWh}} \right)}{100 \left( \frac{\text{tonne}}{\text{day}} \right)} \\ & = 4072.28 \left( \frac{\$}{\text{tonne product}} \right) \end{aligned}$$

Other operating cost is

$$\text{Other operating cost} \left( \frac{\$}{\text{tonne product}} \right) = \text{electricity cost} \left( \frac{\$}{\text{tonne product}} \right) \times 0.1 \quad (13)$$

$$\text{Other operating cost} \left( \frac{\$}{\text{tonne product}} \right) = 4072.28 \left( \frac{\$}{\text{tonne product}} \right) \times 0.1 = 407.23 \left( \frac{\$}{\text{tonne produ}} \right) \quad (13b)$$

### Cathode PSA cost

We use pressure swing adsorption (PSA) as the cathode gas separation approach, which is based on a reference cost of \$1989043 of 1000 m<sup>3</sup>/hr flowrate (scaling factor 0.7).<sup>3,4</sup>

$$\text{Input CO}_2 \text{ flow rate} \left( \frac{\text{m}^3}{\text{hr}} \right) = \frac{\text{CO}_2 \text{ required} \left( \frac{\text{tonne}}{\text{day}} \right) \times 1000 \times 24.5}{\text{CO}_2 \text{ molecilar weight} \left( \frac{\text{g}}{\text{mol}} \right) \times 24 \left( \frac{\text{hr}}{\text{day}} \right)} \quad (14)$$

$$\text{Input } CO_2 \text{ flow rate } \left( \frac{m^3}{hr} \right) = \frac{764.05 \left( \frac{\text{tonne}}{\text{day}} \right) \times 1000 \times 24.5}{44 \left( \frac{g}{mol} \right) \times 24 \left( \frac{hr}{day} \right)} = 17726.65 \left( \frac{m^3}{hr} \right) \quad (14b)$$

$$\text{Output } CO_2 \text{ flow rate } \left( \frac{m^3}{hr} \right) = \text{Input } CO_2 \text{ flow rate } \left( \frac{m^3}{hr} \right) \times (1 - \text{single pass utilization}) \quad (15)$$

$$\text{Output } CO_2 \text{ flow rate } \left( \frac{m^3}{hr} \right) = 17726.65 \left( \frac{m^3}{hr} \right) \times (1 - 0.25) = 13294.99 \left( \frac{m^3}{hr} \right) \quad (15b)$$

$$H_2 \text{ production } \left( \frac{mol}{hr} \right) = \frac{\text{Total current (A)} \times (1 - FE) \times 3600 \left( \frac{s}{hr} \right)}{2 \left( \frac{\text{electrons}}{\text{product}} \right) \times 96485 \left( \frac{sA}{mol} \right)} \quad (16)$$

$$H_2 \text{ production } \left( \frac{mol}{hr} \right) = \frac{96958935.28(A) \times (1 - 0.3) \times 3600 \left( \frac{s}{hr} \right)}{2 \left( \frac{\text{electrons}}{\text{product}} \right) \times 96485 \left( \frac{sA}{mol} \right)} = 1266189.13 \left( \frac{mol}{hr} \right) \quad (16b)$$

$$H_2 \text{ flow rate } \left( \frac{m^3}{hr} \right) = 1266189.13 \left( \frac{mol}{hr} \right) \times \frac{24.5}{1000} = 31021.63 \left( \frac{m^3}{hr} \right) \quad (17)$$

$$\text{Output } CO_2 \text{ flow rate } \left( \frac{m^3}{hr} \right) = \text{Input } CO_2 \text{ flow rate } \left( \frac{m^3}{hr} \right) \times (1 - \text{single pass utilization}) \quad (18)$$

$$\text{Output } CO_2 \text{ flow rate } \left( \frac{m^3}{hr} \right) = 17726.65 \left( \frac{m^3}{hr} \right) \times (1 - 0.25) = 13294.99 \left( \frac{m^3}{hr} \right) \quad (18b)$$

$$\text{Cathode PSA capital cost (\$)} = \text{PSA ref cost (\$)} \times \left( \frac{\text{Total cathode flow rate } \left( \frac{m^3}{hr} \right)}{\text{PSA ref scale } \left( \frac{m^3}{hr} \right)} \right)^{\text{PSA scaling factor}} \quad (19)$$

$$\text{Cathode PSA capital cost (\$)} = 1989043 (\$) \times \left( \frac{44316.62 \left(\frac{m^3}{hr}\right)}{1000 \left(\frac{m^3}{hr}\right)} \right)^{0.7} = 28264467.66(\$) \quad (19b)$$

$$\text{Cathode Captial PSA cost} \left( \frac{\$}{\text{tonne product}} \right) = \frac{\text{CRF electrolyzer} \times \text{Cathode PSA capital cost (\$)}}{\text{Capacity factor} \times 365 \times \text{Production rate} \left( \frac{\text{tonne}}{\text{day}} \right)} \quad (20)$$

$$\text{Cathode Captial PSA cost} \left( \frac{\$}{\text{tonne product}} \right) = \frac{0.1424 \times 28264467.66(\$)}{0.9 \times 365 \times 100 \left( \frac{\text{tonne}}{\text{day}} \right)} = 122.50 \left( \frac{\$}{\text{tonne product}} \right) \quad (20b)$$

$$\begin{aligned} \text{Cathode PSA operating cost} \left( \frac{\$}{\text{tonne product}} \right) & \quad (21) \\ & = \frac{\text{PSA energy consumed} \left( \frac{kWh}{m^3} \right) \times \text{total flow rate} \left( \frac{m^3}{hr} \right)}{\text{Production rate} \left( \frac{\text{tonne}}{\text{day}} \right)} \end{aligned}$$

$$\begin{aligned} \text{Cathode PSA operating cost} \left( \frac{\$}{\text{tonne product}} \right) & \quad (21b) \\ & = \frac{0.25 \left( \frac{kWh}{m^3} \right) \times 44316.62 \left( \frac{m^3}{hr} \right) \times 24 \left( \frac{hr}{day} \right) \times 0.05 \left( \frac{\$}{kWh} \right)}{100 \left( \frac{\text{tonne}}{\text{day}} \right)} = 132.95 \left( \frac{\$}{\text{tonne product}} \right) \end{aligned}$$

## Anode PSA cost

We assume that there are two phenomena in this system, with carbonate formation and without carbonate formation.

For the first situation, we do not need to separate the anode gas, because it only has O<sub>2</sub>. However, when the system with carbonate formation, it means that we can get CO<sub>2</sub> and O<sub>2</sub> at the anode side, so we need to separate them by using PSA. Furthermore, when the system has carbonate formation, the maximum CO<sub>2</sub> single-pass utilization is 25%, and all the unreacted CO<sub>2</sub> is going through the membrane to the anode side, so we only need to calculate the anode PSA cost instead of cathode PSA cost.

$$\begin{aligned}
 \text{Crossover } CO_2 \left( \frac{\text{tonne } CO_2}{\text{tonne product}} \right) & \quad (22) \\
 &= \text{molar ratio} \left( \frac{CO_2}{\text{product}} \right) \times \text{crossover ratio} \times \frac{CO_2 \text{ molecular weight} \left( \frac{g}{\text{mol}} \right)}{\text{Product molecular weight} \left( \frac{g}{\text{mol}} \right)} \\
 &= 2 \times 3 \times \frac{44 \frac{g}{\text{mol}}}{46.7 \left( \frac{g}{\text{mol}} \right)} = 5.73 \left( \frac{\text{tonne } CO_2}{\text{tonne product}} \right)
 \end{aligned}$$

$$\begin{aligned}
 \text{Crossover } CO_2 \text{ flow rate} \left( \frac{m^3}{hr} \right) & \quad (23) \\
 &= \text{Crossover } CO_2 \left( \frac{\text{tonne } CO_2}{\text{tonne product}} \right) \times \text{Production rate} \left( \frac{t}{hr} \right) \\
 &= 5.73 \left( \frac{\text{tonne } CO_2}{\text{tonne product}} \right) \times 100 \left( \frac{\text{tonne}}{\text{day}} \right) \times \frac{24.5 \times 1000}{24 \left( \frac{hr}{\text{day}} \right) \times 44}
 \end{aligned}$$

$$O_2 \text{ flow rate} \left( \frac{m^3}{hr} \right) = \frac{\text{Total current density} (A) \times 3600 \left( \frac{s}{hr} \right) \times 24.5}{4 \left( \frac{\text{electrons}}{\text{mole } O_2} \right) \times 96485 \times 1000} \quad (24)$$

$$O_2 \text{ flow rate } \left( \frac{m^3}{hr} \right) = \frac{96958935.28(A) \times 3600 \left( \frac{s}{hr} \right) \times 24.5}{4 \left( \frac{electrons}{mole O_2} \right) \times 96485 \times 1000} = 22158.31 \left( \frac{m^3}{hr} \right) \quad (24b)$$

$$\text{Anode PSA capital cost } (\$) = \text{PSA ref cost } (\$) \times \left( \frac{\text{Total anode flow rate } \left( \frac{m^3}{hr} \right)}{\text{PSA ref scale } \left( \frac{m^3}{hr} \right)} \right)^{\text{PSA scaling factor}} \quad (25)$$

$$\text{Anode PSA capital cost } (\$) = 1989043 (\$) \times \left( \frac{35453.30 \left( \frac{m^3}{hr} \right)}{1000 \left( \frac{m^3}{hr} \right)} \right)^{0.7} = 24177077.42 (\$) \quad (25b)$$

$$\text{Anode Captial PSA cost } \left( \frac{\$}{\text{tonne product}} \right) = \frac{CRF_{\text{electrolyzer}} \times \text{Anode PSA capital cost } (\$)}{\text{Capacity factor} \times 365 \times \text{Production rate } \left( \frac{\text{tonne}}{\text{day}} \right)} \quad (26)$$

$$\text{Anode Captial PSA cost } \left( \frac{\$}{\text{tonne product}} \right) = \frac{0.1424 \times 24177077.42 (\$)}{0.9 \times 365 \times 100 \left( \frac{\text{tonne}}{\text{day}} \right)} = 104.79 \quad (26b)$$

$$\begin{aligned} \text{Anode PSA operating cost } \left( \frac{\$}{\text{tonne product}} \right) & \quad (27) \\ & = \frac{\text{PSA energy consumed } \left( \frac{kWh}{m^3} \right) \times \text{total flow rate } \left( \frac{m^3}{hr} \right)}{\text{Production rate } \left( \frac{to}{d} \right)} \end{aligned}$$

$$\begin{aligned}
& \text{Anode PSA operating cost} \left( \frac{\$}{\text{tonne product}} \right) & (27b) \\
& = \frac{0.25 \left( \frac{\text{kWh}}{\text{m}^3} \right) \times 35453.30 \left( \frac{\text{m}^3}{\text{hr}} \right) \times 24 \left( \frac{\text{hr}}{\text{day}} \right) \times 0.05 \left( \frac{\$}{\text{kWh}} \right)}{100 \left( \frac{\text{tonne}}{\text{day}} \right)} = 106.36 \left( \frac{\$}{\text{tonne product}} \right)
\end{aligned}$$

### Anolyte cost (only for water)

$$\text{Electrolyzer surface area (m}^2\text{)} = \frac{\text{Total current (A)} \times 1000}{\text{Current density} \left( \frac{\text{mA}}{\text{cm}^2} \right) \times 10000} \quad (28)$$

$$\text{Electrolyzer surface area (m}^2\text{)} = \frac{96958935.28(\text{A}) \times 1000}{100 \left( \frac{\text{mA}}{\text{cm}^2} \right) \times 10000} = 96958.94 \text{ (m}^2\text{)} \quad (28b)$$

$$\begin{aligned}
& \text{Electrolyte weight (tonne)} & (29) \\
& = \text{Electrolyzer surface area (m}^2\text{)} \times \text{Volume ratio of electrolyte} \left( \frac{\text{L}}{\text{m}^2} \right) \times \frac{1 \left( \frac{\text{kg}}{\text{L}} \right)}{1000 \left( \frac{\text{kg}}{\text{tonne}} \right)}
\end{aligned}$$

$$\text{Electrolyte weight (tonne)} = 96958.94 \text{ (m}^2\text{)} \times 100 \left( \frac{\text{L}}{\text{m}^2} \right) \times \frac{1 \left( \frac{\text{kg}}{\text{L}} \right)}{1000 \left( \frac{\text{kg}}{\text{tonne}} \right)} = 9695.89 \text{ (tonne)} \quad (29b)$$

$$\text{Anolyte cost (\$)} = \text{Electrolyte weight (tonne)} \times \text{water price} \left( \frac{\$}{\text{tonne}} \right) \quad (30)$$

$$\text{Anolyte cost (\$)} = 9695.89 \text{ (tonne)} \times 1 \left( \frac{\$}{\text{tonne}} \right) = 9695.89(\$) \quad (30b)$$

$$CRF \text{ anolyte} = \frac{\text{Discount rate} \times (1 + \text{discount rate})^{\text{Anolyte lifetime}}}{(1 + \text{discount rate})^{\text{Anolyte lifetime}} - 1} = 1.07 \quad (31)$$

$$\begin{aligned} \text{Anolyte cost} \left( \frac{\$}{\text{tonne product}} \right) &= \frac{CRF \text{ anolyte} \times \text{anolyte cost} (\$)}{\text{Capacity factor} \times 365 \left( \frac{\text{days}}{\text{year}} \right) \times \text{Productionrate} \left( \frac{\text{tonne}}{\text{day}} \right)} = \frac{0.9 \times}{0.9 \times} \\ &= 0.3158 \left( \frac{\$}{\text{tonne product}} \right) \end{aligned} \quad (32)$$

## Distillation cost

$$\begin{aligned} \text{Liquid product solution flow rate} \left( \frac{\text{m}^3}{\text{hr}} \right) &= \text{Liquid product flow rate} \left( \frac{\text{m}^3}{\text{hr}} \right) + \text{water solvent flow rate} \left( \frac{\text{m}^3}{\text{hr}} \right) \\ &= \frac{\text{Production rate} \left( \frac{\text{tonne}}{\text{day}} \right) \times 10}{\text{Product desity} \left( \frac{\text{kg}}{\text{L}} \right) \times 24 \left( \frac{\text{hrs}}{\text{day}} \right)} = \frac{100 \left( \frac{\text{tonne}}{\text{day}} \right) \times 10}{0.789 \left( \frac{\text{kg}}{\text{L}} \right) \times 24 \left( \frac{\text{hrs}}{\text{day}} \right)} = 52.81 \left( \frac{\text{m}^3}{\text{hr}} \right) \end{aligned} \quad (33)$$

$$\begin{aligned} \text{Distillation capital cost} (\$) &= \text{Distillation ref cost} (\$) \times \left( \frac{\text{Liquid product solution flow rate} \left( \frac{\text{m}^3}{\text{hr}} \right)}{\text{Distillation ref scale} \left( \frac{\text{L}}{\text{min}} \right) \times 6} \right)^{0.7} \\ &= 4162240 (\$) \times \left( \frac{52.81 \left( \frac{\text{m}^3}{\text{hr}} \right) \times 1000 \left( \frac{\text{L}}{\text{m}^3} \right)}{1000 \left( \frac{\text{L}}{\text{min}} \right) \times 60 \left( \frac{\text{mins}}{\text{hr}} \right)} \right)^{0.7} = 3806444.24 (\$) \end{aligned} \quad (34)$$

$$\begin{aligned}
& \text{Distillation capital cost} \left( \frac{\$}{\text{tonne product}} \right) & (35) \\
& = \frac{\text{CRF electrolyzer} \times \text{distillation capital cost} (\$)}{\text{Capacity factor} \times 365 \times \text{Production rate} \left( \frac{\text{tonne}}{\text{day}} \right)} = \frac{0.1424 \times 3806444.24(\$)}{0.9 \times 365 \times 100 \left( \frac{\text{tonne}}{\text{day}} \right)} \\
& = 16.50 \left( \frac{\$}{\text{tonne product}} \right)
\end{aligned}$$

$$\begin{aligned}
& \text{Distillation operating cost} \left( \frac{\$}{\text{tonne product}} \right) & (36) \\
& \text{Distillation ref operating cost} \left( \frac{\$}{\text{day}} \right) \times \frac{\text{Liquid product solution } j}{\text{Distillation ref scc}} \\
& = \frac{\text{Distillation ref operating cost} \left( \frac{\$}{\text{day}} \right) \times \frac{\text{Liquid product solution } j}{\text{Distillation ref scc}}}{\text{Production rate} \left( \frac{\text{tonne}}{\text{day}} \right)} \\
& = \frac{9895.17 \left( \frac{\$}{\text{day}} \right) \times \frac{52.81 \left( \frac{\text{m}^3}{\text{hr}} \right) \times 1000 \left( \frac{\text{L}}{\text{m}^3} \right)}{1000 \left( \frac{\text{L}}{\text{min}} \right) \times 60 \left( \frac{\text{mins}}{\text{hr}} \right)}}{100 \left( \frac{\text{tonne}}{\text{day}} \right)} = 87.09 \left( \frac{\$}{\text{tonne product}} \right)
\end{aligned}$$

### Balance of plant and installation cost without carbonate formation

$$\begin{aligned}
& \text{Total captial cosst} \left( \frac{\$}{\text{tonne product}} \right) & (37) \\
& = \text{Electolyzer cost} \left( \frac{\$}{\text{tonne product}} \right) + \text{CM cost} \left( \frac{\$}{\text{tonne product}} \right) + C_i \\
& \left( \frac{\$}{\text{tonne product}} \right) + \text{Distillation capital cost} \left( \frac{\$}{\text{tonne product}} \right) \\
& = 3235.82 + 1215.90 + 122.50 + 16.50 = 4590.72 \left( \frac{\$}{\text{tonne product}} \right)
\end{aligned}$$



$$\begin{aligned}
BoP \left( \frac{\$}{\text{tonne product}} \right) & \quad (38) \\
& = BoP \text{ factor} \times \text{Total capital cost} \left( \frac{\$}{\text{tonne product}} \right) = 0.5 \times 4590.72 \left( \frac{\$}{\text{tonne produ}} \right) \\
& = 2295.36 \left( \frac{\$}{\text{tonne product}} \right)
\end{aligned}$$

$$\begin{aligned}
\text{Installation cost} \left( \frac{\$}{\text{tonne product}} \right) & \quad (39) \\
& = \text{Lang factor} \times \text{Total capital cost} \left( \frac{\$}{\text{tonne product}} \right) = 1 \times 4590.72 \left( \frac{\$}{\text{tonne produ}} \right) \\
& = 4590.72 \left( \frac{\$}{\text{tonne product}} \right)
\end{aligned}$$

### Balance of plant and installation cost with carbonate formation

$$\begin{aligned}
\text{Total capital cost} \left( \frac{\$}{\text{tonne product}} \right) & \quad (40) \\
& = \text{Electolyzer cost} \left( \frac{\$}{\text{tonne product}} \right) + \text{CM cost} \left( \frac{\$}{\text{tonne product}} \right) + A: \\
& \quad \left( \frac{\$}{\text{tonne product}} \right) + \text{Distillation capital cost} \left( \frac{\$}{\text{tonne product}} \right) \\
& = 3235.82 + 1215.90 + 104.79 + 16.50 = 4573.00 \left( \frac{\$}{\text{tonne product}} \right)
\end{aligned}$$

$$\begin{aligned}
BoP \left( \frac{\$}{\text{tonne product}} \right) & \quad (41) \\
& = BoP \text{ factor} \times \text{Total capital cost} \left( \frac{\$}{\text{tonne product}} \right) = 0.5 \times 4573.00 \left( \frac{\$}{\text{tonne produ}} \right) \\
& = 2286.50 \left( \frac{\$}{\text{tonne product}} \right)
\end{aligned}$$

$$\begin{aligned}
& \text{Installation cost} \left( \frac{\$}{\text{tonne product}} \right) & (42) \\
& = \text{Lang factor} \times \text{Total capital cost} \left( \frac{\$}{\text{tonne product}} \right) = 1 \times 4573.00 \left( \frac{\$}{\text{tonne product}} \right) \\
& = 4573.00 \left( \frac{\$}{\text{tonne product}} \right)
\end{aligned}$$

**Total production cost of ethanol based the model we developed (without carbonate formation):**

$$\begin{aligned}
& \text{Total production cost} \left( \frac{\$}{\text{tonne product}} \right) & (43) \\
& = CO_2 \text{ cost} \left( \frac{\$}{\text{tonne product}} \right) + H_2O \text{ cost} \left( \frac{\$}{\text{tonne product}} \right) + \text{electrolyzer operating} \\
& \left( \frac{\$}{\text{tonne product}} \right) + \text{electrolyzer capital cost} \left( \frac{\$}{\text{tonne product}} \right) + \text{other operating cost} \\
& \left( \frac{\$}{\text{tonne product}} \right) + \text{cathode PSA capital \& operating cost} \left( \frac{\$}{\text{tonne product}} \right) \\
& + \text{distillation capital \& operating cost} \left( \frac{\$}{\text{tonne product}} \right) + \text{BoP cost} \left( \frac{\$}{\text{tonne product}} \right) \\
& + \text{installation cost} \left( \frac{\$}{\text{tonne product}} \right) \\
& = 305.62 + 15.24 + 4072.28 + 3235.82 + 407.23 + 255.45 + 103.59 + 2295.36 + 4573.00 \\
& = 15281.31 \left( \frac{\$}{\text{tonne product}} \right)
\end{aligned}$$

**Total production cost of ethanol based the model we developed (with carbonate formation):**

$$\begin{aligned}
& \text{Total production cost} \left( \frac{\$}{\text{tonne product}} \right) && (44) \\
& = CO_2 \text{ cost} \left( \frac{\$}{\text{tonne product}} \right) + H_2O \text{ cost} \left( \frac{\$}{\text{tonne product}} \right) + \text{electrolyzer operating} \\
& \left( \frac{\$}{\text{tonne product}} \right) + \text{electrolyzer capital cost} \left( \frac{\$}{\text{tonne product}} \right) + \text{other operating cc} \\
& \left( \frac{\$}{\text{tonne product}} \right) + \text{anode PSA capital \& operating cost} \left( \frac{\$}{\text{tonne product}} \right) \\
& + \text{distillation capital \& operating cost} \left( \frac{\$}{\text{tonne product}} \right) + \text{BoP cost} \left( \frac{\$}{\text{tonne produc}} \right) \\
& + \text{installation cost} \left( \frac{\$}{\text{tonne product}} \right) \\
& = 305.62 + 15.24 + 4072.28 + 3235.82 + 407.23 + 211.15 + 103.59 + 2286.50 + 4 \\
& = 15210.43 \left( \frac{\$}{\text{tonne product}} \right)
\end{aligned}$$

**Table S2.** The input parameters for the univariate analysis

| <b>Parameters</b>                     | <b>Highly optimized</b> | <b>Optimized</b> | <b>Base</b> |
|---------------------------------------|-------------------------|------------------|-------------|
| Faradaic efficiency (%)               | 90                      | 60               | 30          |
| Current density (mA/cm <sup>2</sup> ) | 1000                    | 500              | 100         |
| Electricity cost (cent/kWh)           | 1                       | 3                | 5           |
| Cell voltage (V)                      | 1.5                     | 2.5              | 3.5         |
| Single-pass utilization (%)           | 50                      | 25               | 10          |
| System lifetime (year)                | 10                      | 20               | 30          |
| Electrolyzer cost (\$/kW)             | 250                     | 400              | 550         |
| CO <sub>2</sub> price (\$/tonne)      | 20                      | 30               | 40          |
| MEA lifetime (year)                   | 5                       | 3                | 1           |

**Table S3.** The result of the univariate analysis for methanol production.

| <b>Methanol production cost (USD/tonne)</b> |                         |                  |             |
|---------------------------------------------|-------------------------|------------------|-------------|
| <b>Variate</b>                              | <b>Highly optimized</b> | <b>Optimized</b> | <b>Base</b> |
| Faradaic efficiency                         | 996.6                   | 1335.6           | 2340.9      |
| Current density                             | 1223.3                  | 1335.6           | 2233.9      |
| Electricity price                           | 856.4                   | 1335.6           | 1814.8      |
| Cell voltage                                | 969.7                   | 1335.6           | 1701.5      |
| Single-pass utilization                     | 1211.9                  | 1335.6           | 1690.3      |
| System lifetime                             | 1287.8                  | 1335.6           | 1501.7      |
| Electrolyzer price                          | 1251.4                  | 1335.6           | 1419.8      |
| CO <sub>2</sub> price                       | 1280.7                  | 1335.6           | 1390.5      |
| MEA lifetime                                | 1326.8                  | 1335.6           | 1379.4      |

**Table S4.** The result of the univariate analysis for ethanol production.

| <b>Ethanol production cost (USD/tonne)</b> |                         |                  |             |
|--------------------------------------------|-------------------------|------------------|-------------|
| <b>Parameters</b>                          | <b>Highly optimized</b> | <b>Optimized</b> | <b>Base</b> |
| Faradaic efficiency                        | 1327.5                  | 1795.7           | 3185.9      |
| Current density                            | 1639.5                  | 1795.7           | 3045.2      |
| Electricity cost                           | 1129.2                  | 1795.7           | 2462.2      |
| Cell voltage                               | 1286.8                  | 1795.7           | 2304.6      |
| Single-pass utilization                    | 1627.6                  | 1795.7           | 2279.5      |
| System lifetime                            | 1732.7                  | 1795.7           | 2014.8      |
| Electrolyzer cost                          | 1678.6                  | 1795.7           | 1912.9      |
| CO <sub>2</sub> price                      | 1719.3                  | 1795.7           | 1872.1      |
| MEA lifetime                               | 1783.6                  | 1795.7           | 1856.7      |

**Table S5.** The result of the univariate analysis for n-propanol production.

| <b>n-Propanol production cost (USD/tonne)</b> |                         |                  |             |
|-----------------------------------------------|-------------------------|------------------|-------------|
| <b>Parameters</b>                             | <b>Highly optimized</b> | <b>Optimized</b> | <b>Base</b> |
| Faradaic efficiency                           | 1501.1                  | 2038.1           | 3633.2      |
| Current density                               | 1858.5                  | 2038.1           | 3475.1      |
| Electricity cost                              | 1271.6                  | 2038.1           | 2804.7      |
| Cell voltage                                  | 1452.9                  | 2038.1           | 2623.4      |
| Single-pass utilization                       | 1846.6                  | 2038.1           | 2590.1      |
| System lifetime                               | 1967.2                  | 2038.1           | 2284.8      |
| Electrolyzer cost                             | 1903.4                  | 2038.1           | 2172.8      |
| CO <sub>2</sub> price                         | 1950.3                  | 2038.1           | 2126.0      |
| MEA lifetime                                  | 2024.2                  | 2038.1           | 2108.3      |

**Table S6.** The result of the univariate analysis for ethylene production.

| <b>Ethylene production cost (USD/tonne)</b> |                         |                  |             |
|---------------------------------------------|-------------------------|------------------|-------------|
| <b>Parameters</b>                           | <b>Highly optimized</b> | <b>Optimized</b> | <b>Base</b> |
| Faradaic efficiency                         | 2053.4                  | 2839.1           | 5173.1      |
| Current density                             | 2563.9                  | 2839.1           | 5040.9      |
| Electricity cost                            | 1734.9                  | 2839.1           | 3943.4      |
| Cell voltage                                | 1988.8                  | 2839.1           | 3689.5      |
| Single-pass utilization                     | 2573.4                  | 2839.1           | 3610.3      |
| System lifetime                             | 2738.6                  | 2839.1           | 3188.7      |
| Electrolyzer cost                           | 2633.0                  | 2839.1           | 3045.3      |
| CO <sub>2</sub> price                       | 2805.9                  | 2839.1           | 3006.1      |
| MEA lifetime                                | 2713.7                  | 2839.1           | 2964.6      |



**Table S7.** The summary of production costs in the base, optimized, and highly optimized cases.

| Product    | Condition                   | Chemicals<br>(CO <sub>2</sub> and<br>H <sub>2</sub> O) | Electrolyze<br>r cost<br>(capital and<br>operating) | Other<br>operating<br>cost | PSA | Distillation | BoP  | Installation | Total<br>cost |
|------------|-----------------------------|--------------------------------------------------------|-----------------------------------------------------|----------------------------|-----|--------------|------|--------------|---------------|
| Methanol   | Highly<br>optimized<br>case | 69                                                     | 92                                                  | 8                          | 16  | 96           | 16   | 33           | <b>331</b>    |
|            | Optimized<br>case           | 179                                                    | 707                                                 | 63                         | 68  | 98           | 73   | 147          | <b>1336</b>   |
|            | Base case                   | 564                                                    | 5254                                                | 293                        | 288 | 103          | 1676 | 3352         | <b>11530</b>  |
| Ethanol    | Highly<br>optimized<br>case | 91                                                     | 128                                                 | 12                         | 20  | 96           | 20   | 40           | <b>408</b>    |
|            | Optimized<br>case           | 244                                                    | 984                                                 | 87                         | 90  | 98           | 97   | 195          | <b>1796</b>   |
|            | Base case                   | 779                                                    | 7308                                                | 407                        | 383 | 104          | 2319 | 4638         | <b>15939</b>  |
| n-Propanol | Highly<br>optimized<br>case | 103                                                    | 147                                                 | 13                         | 23  | 95           | 22   | 44           | <b>447</b>    |
|            | Optimized<br>case           | 279                                                    | 1132                                                | 100                        | 101 | 96           | 110  | 220          | <b>2038</b>   |
|            | Base case                   | 894                                                    | 8404                                                | 468                        | 432 | 102          | 2662 | 5324         | <b>18287</b>  |
| Ethylene   | Highly<br>optimized<br>case | 151                                                    | 214                                                 | 19                         | 50  | -            | 32   | 63           | <b>529</b>    |
|            | Optimized<br>case           | 403                                                    | 1653                                                | 143                        | 172 | -            | 156  | 312          | <b>2839</b>   |
|            | Base case                   | 1287                                                   | 13996                                               | 669                        | 674 | -            | 3798 | 7596         | <b>28020</b>  |

**Table S8.** The results of the waterfall analysis for methanol.

| <b>Methanol production cost roadmap (USD/tonne)</b> |                            |                           |                       |
|-----------------------------------------------------|----------------------------|---------------------------|-----------------------|
| <b>Parameters</b>                                   | <b>Before optimization</b> | <b>After optimization</b> | <b>Cost reduction</b> |
| Faradaic efficiency                                 | 11048.4                    | 3955.6                    | 7092.8                |
| Current density                                     | 3955.6                     | 1817.4                    | 2138.2                |
| Cell voltage                                        | 1817.4                     | 1255.5                    | 561.9                 |
| Single-pass utilization                             | 1255.5                     | 1073.2                    | 182.3                 |
| Electrolyzer operating cost                         | 1073.2                     | 572.3                     | 500.9                 |
| Electrolyzer capital cost                           | 572.3                      | 498.2                     | 74.0                  |
| System lifetime                                     | 498.2                      | 432.8                     | 65.5                  |
| MEA lifetime                                        | 432.8                      | 424.0                     | 8.8                   |
| CO <sub>2</sub> price                               | 424.0                      | 369.1                     | 54.9                  |

**Table S9.** The results of the waterfall analysis for ethanol.

| <b>Ethanol production cost roadmap (USD/tonne)</b> |                            |                           |                       |
|----------------------------------------------------|----------------------------|---------------------------|-----------------------|
| <b>Parameters</b>                                  | <b>Before optimization</b> | <b>After optimization</b> | <b>Cost reduction</b> |
| Faradaic efficiency                                | 15281.3                    | 5432.9                    | 9848.4                |
| Current density                                    | 5432.9                     | 2458.8                    | 2974.1                |
| Cell voltage                                       | 2458.8                     | 1677.2                    | 781.6                 |
| Single-pass utilization                            | 1677.2                     | 1430.6                    | 246.6                 |
| Electrolyzer operating cost                        | 1430.6                     | 733.8                     | 696.8                 |
| Electrolyzer capital cost                          | 733.8                      | 630.8                     | 103.0                 |
| System lifetime                                    | 630.8                      | 550.1                     | 80.7                  |
| MEA lifetime                                       | 550.1                      | 537.9                     | 12.2                  |
| CO <sub>2</sub> price                              | 537.9                      | 461.5                     | 76.4                  |

**Table S10.** The results of the waterfall analysis for n-propanol.

| <b>n-Propanol production cost roadmap (USD/tonne)</b> |                            |                           |                       |
|-------------------------------------------------------|----------------------------|---------------------------|-----------------------|
| <b>Parameters</b>                                     | <b>Before optimization</b> | <b>After optimization</b> | <b>Cost reduction</b> |
| FE                                                    | 17536.1                    | 6217.9                    | 11318.2               |
| Current density                                       | 6217.9                     | 2797.6                    | 3420.3                |
| Cell voltage                                          | 2797.6                     | 1898.8                    | 898.8                 |
| Single-pass utilization                               | 1898.8                     | 1618.4                    | 280.4                 |
| Electrolyzer operating cost                           | 1618.4                     | 817.1                     | 801.3                 |
| Electrolyzer capital cost                             | 817.1                      | 698.6                     | 118.5                 |
| System lifetime                                       | 698.6                      | 610.2                     | 88.4                  |
| MEA lifetime                                          | 610.2                      | 596.2                     | 14.0                  |
| CO <sub>2</sub> price                                 | 596.2                      | 508.3                     | 87.9                  |

**Table S11.** The results of the waterfall analysis for ethylene.

| <b>Ethylene production cost roadmap (USD/tonne)</b> |                            |                           |                       |
|-----------------------------------------------------|----------------------------|---------------------------|-----------------------|
| <b>Parameters</b>                                   | <b>Before optimization</b> | <b>After optimization</b> | <b>Cost reduction</b> |
| FE                                                  | 26968.6                    | 9434.0                    | 17534.7               |
| Current density                                     | 9434.0                     | 3949.9                    | 5484.1                |
| Cell voltage                                        | 3949.9                     | 2638.1                    | 1311.8                |
| Single-pass utilization                             | 2638.1                     | 2254.1                    | 384.0                 |
| Electrolyzer operating cost                         | 2254.1                     | 1094.0                    | 1160.1                |
| Electrolyzer capital cost                           | 1094.0                     | 904.1                     | 189.9                 |
| System lifetime                                     | 904.1                      | 776.5                     | 127.6                 |
| MEA lifetime                                        | 776.5                      | 743.1                     | 33.4                  |
| CO <sub>2</sub> price                               | 743.1                      | 617.7                     | 125.5                 |

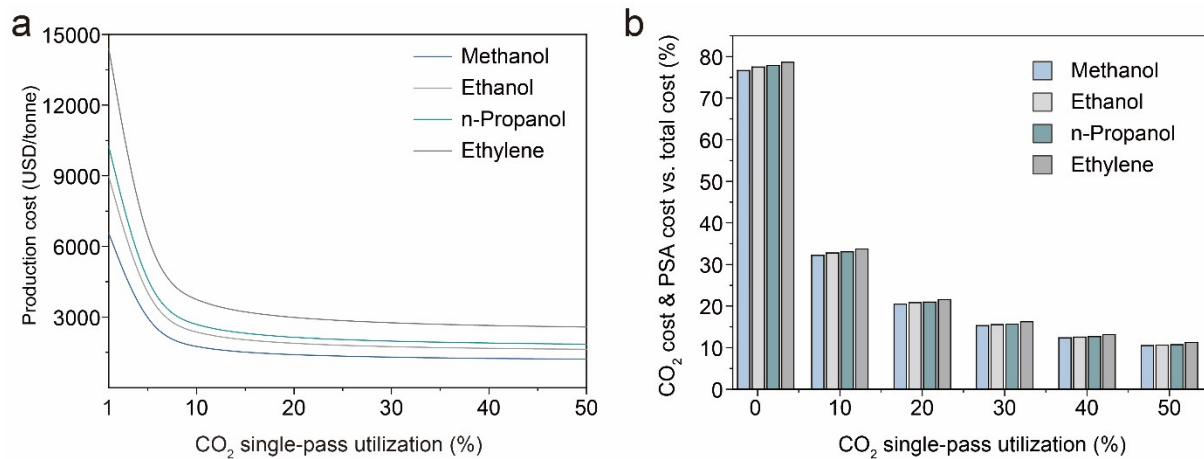

**Figure S2. The impact of single-pass utilization on (a) production cost (b) the ratio of CO<sub>2</sub> cost & PSA cost to total production cost.** We used the optimized case parameters for other modeling inputs.

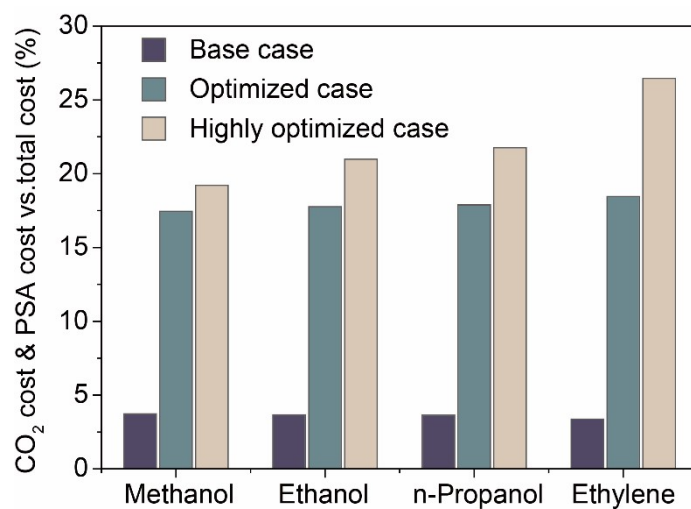

**Figure S3. The ratio of CO<sub>2</sub> cost & PSA cost to total production cost under the condition of the base, optimized, and highly optimized case.** In the base case, the CO<sub>2</sub> and PSA costs contribute to less than 4% of the total production cost due to the extremely high cost of electrolyzer installation and operation. The CO<sub>2</sub> single-pass utilization is 10% in the base case, 25% in the optimized case, and 50% in the highly-optimized case.

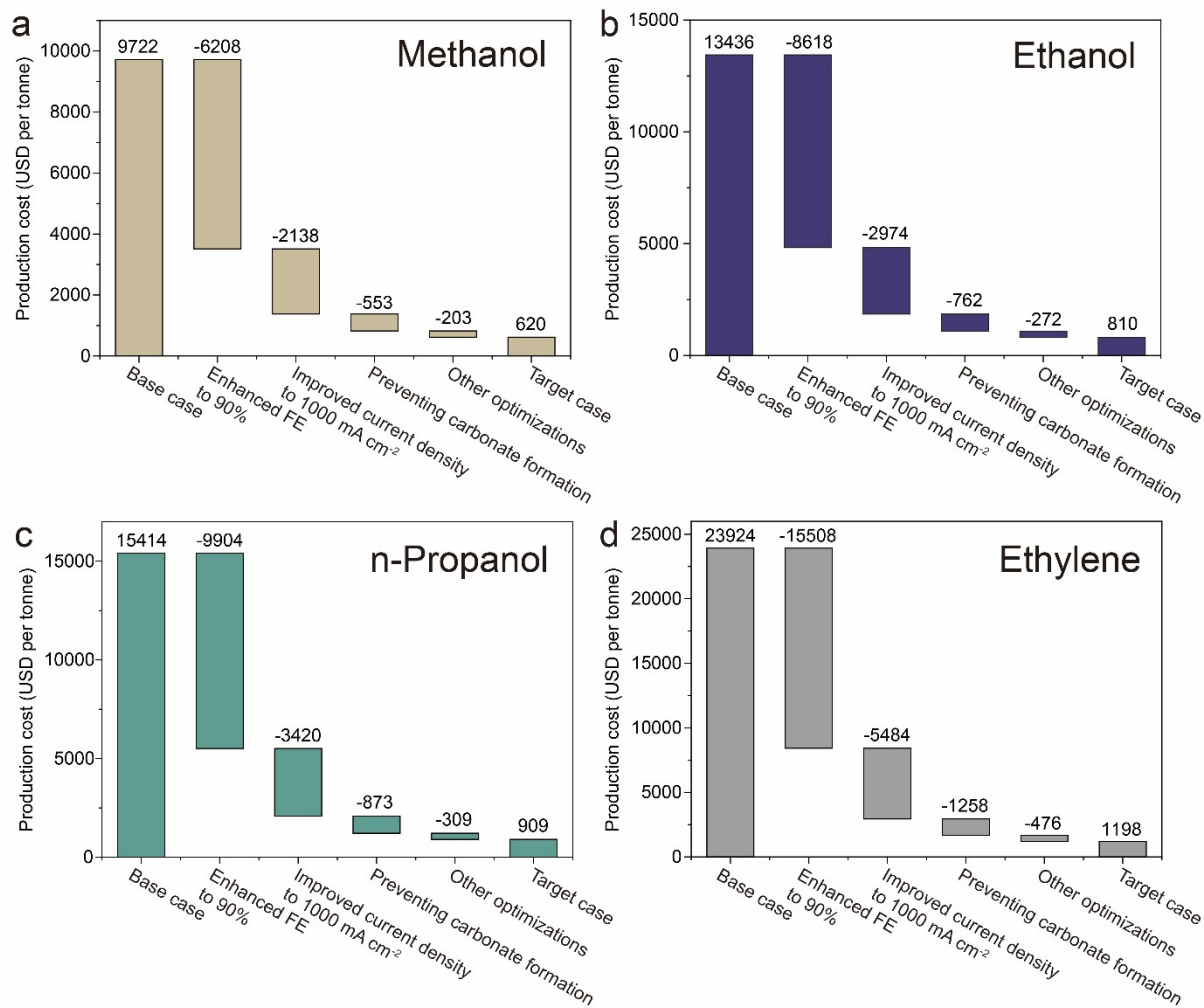

**Figure S4. Waterfall analyses at a constant electricity price of 3 cents per kWh.** The cost reductions caused by preventing carbonate formation are 553, 762, 873, and 1258 USD per tonne for methanol, ethanol, n-propanol, and ethylene.



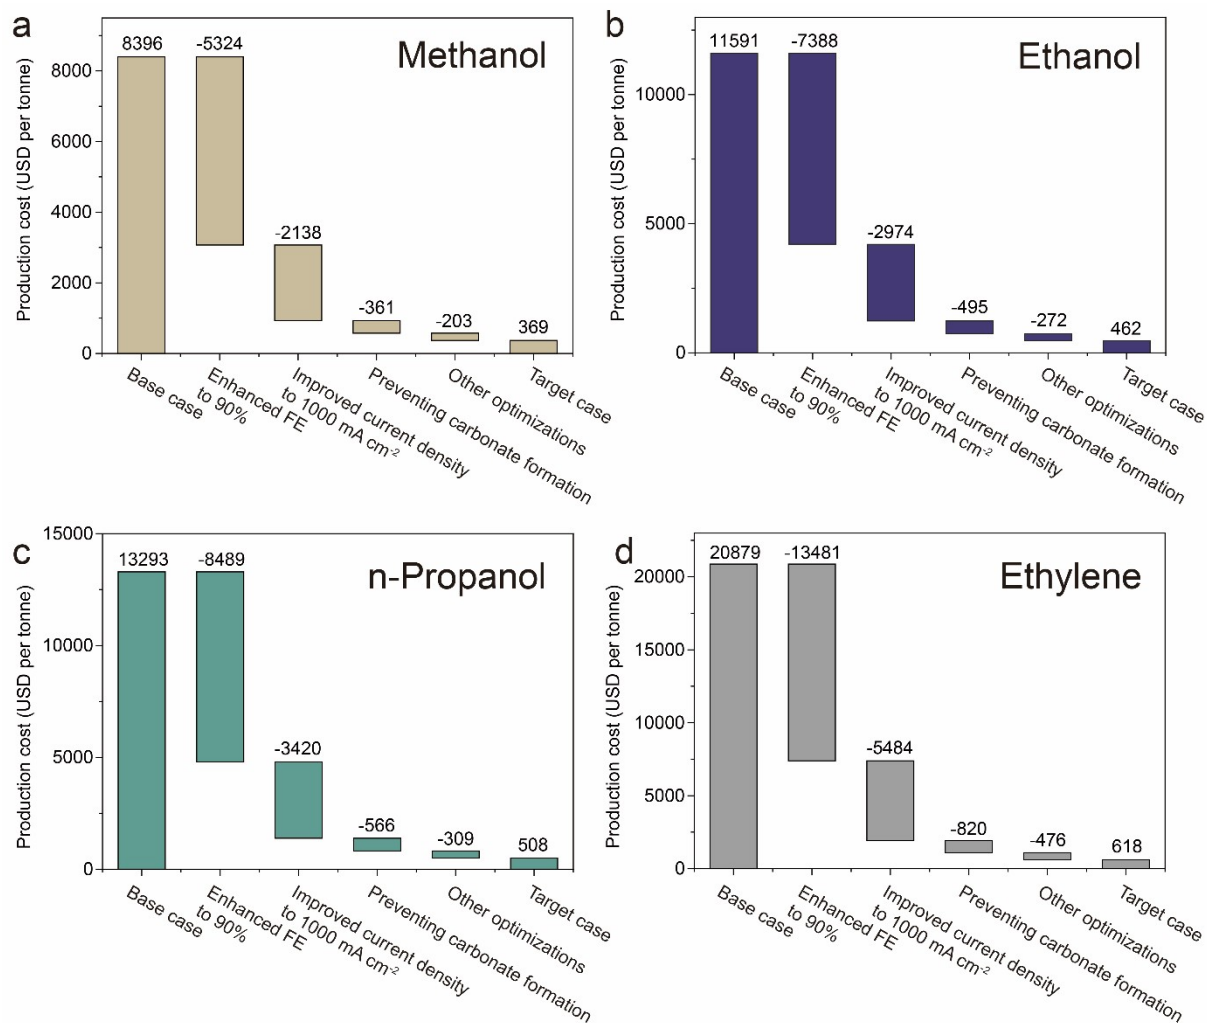

**Figure S5. Waterfall analyses at a constant electricity price of 1 cent per kWh.** The cost reductions caused by preventing carbonate formation are 361, 495, 556, and 820 USD per tonne for methanol, ethanol, n-propanol, and ethylene.

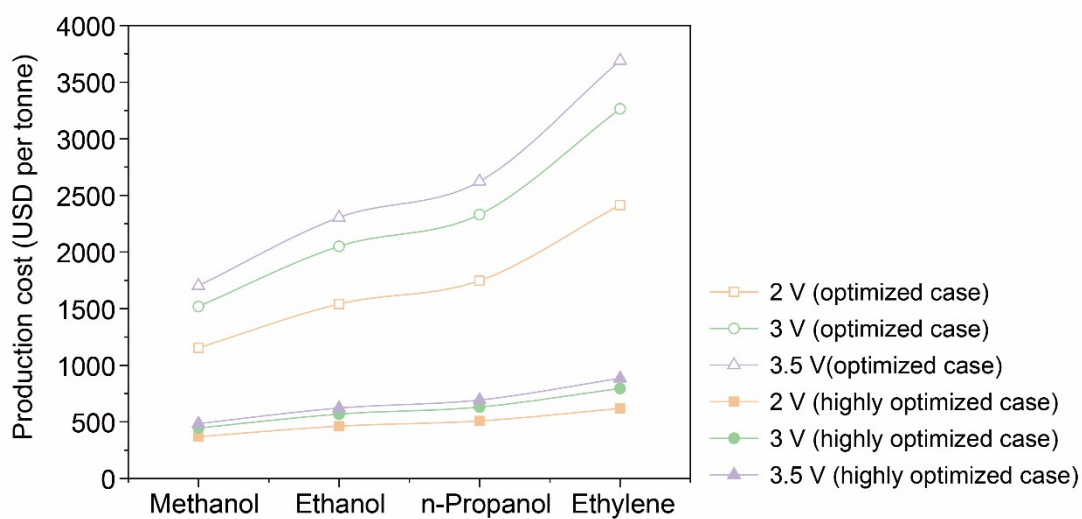

**Figure S6. The analysis of acidic CO<sub>2</sub>RR.** The modeling was performed by screening the impact of cell voltages on the production costs in the optimized and highly optimized cases without carbonate formation.

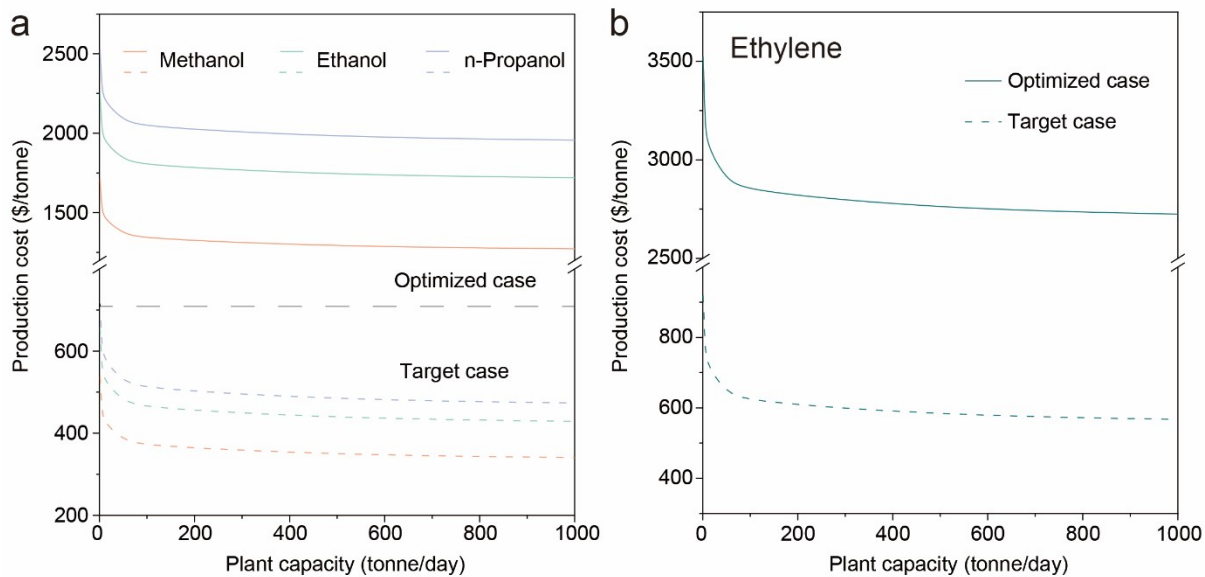

**Figure S7. The impact of plant capacity.** The correlations between production costs and plant capacities at the optimized and target cases for (a) methanol, ethanol, n-propanol, and (b) ethylene.

## Reference

1. J. Sisler, S. Khan, A. H. Ip, M. W. Schreiber, S. A. Jaffer, E. R. Bobicki, C.-T. Dinh and E. H. Sargent, *ACS Energy Lett.* 2021, **6**, 997-1002.
2. A. Ozden, Y. Wang, F. Li, M. Luo, J. Sisler, A. Thevenon, A. Rosas-Hernández, T. Burdyny, Y. Lum, H. Yadegari, T. Agapie, J. C. Peters, E. H. Sargent and D. Sinton, *Joule* 2021, **5**, 706-719.
3. Jouny, M., Luc, W. & Jiao, F. *Ind. Eng. Chem. Res.* 2018, **57**, 2165-2177.
4. Paturska, A., Repele, M. & Bazbauers, G. *Energy Procedia* 2015, **72**, 71-78.
